# Supplementary material for: The Incidence of Postoperative Complications after Gastrectomy Increases in Proportion to the Amount of Preoperative Visceral Fat
Source: Hindawi journal article supplement (doi:10.1155/2019/8404383), 2019-12-16
Supplement: f1 [file 8404383.f1.pdf]

## Supplementary Materials

Univariate and multivariate analyses of postoperative hospital stay, operation time and blood loss during surgery are shown in Supplemental Tables 1-3. VFA was not significantly associated with length of postoperative hospital stay in multivariate analysis (regression coefficient [ $\beta$ ] 0.008, 95% CI -0.010–0.027,  $P=0.38$ ). However, VFA was an independent predictor of the operating time ( $\beta$  0.23, 95%CI 0.11–0.35,  $P<0.001$ ) and amount of blood loss ( $\beta$  0.43, 95% CI 0.12–0.73,  $P=0.006$ ).

Supplemental Table 1: Univariate and multivariate analyses of postoperative hospital stay

| Variable                 |                       | Univariate analysis                               |         | Multivariate analysis                             |         |
|--------------------------|-----------------------|---------------------------------------------------|---------|---------------------------------------------------|---------|
|                          |                       | Regression coefficient [ $\beta$ ] (day) (95% CI) | P value | Regression coefficient [ $\beta$ ] (day) (95% CI) | P value |
| Visceral fat area        | per 1 cm <sup>2</sup> | 0.025 (0.009 – 0.040)                             | 0.002   | 0.008 (-0.010 – 0.027)                            | 0.38    |
| Operative procedure      | TG                    | 2.44 (1.48 – 3.39)                                | <0.001  | 2.35 (1.41 – 3.29)                                | <0.001  |
| Age                      | per 1 year            | 0.14 (0.053 - 0.22)                               | 0.0014  | 0.11 (0.026 – 0.20)                               | 0.011   |
| Surgical approach        | open                  | 5.60 (4.18 – 7.03)                                | 0.012   | 3.65 (1.32 – 6.17)                                | 0.023   |
|                          | robotic               | 1.51 (-0.63 – 3.64)                               | 0.17    | 0.58 (-1.50 – 2.66)                               | 0.59    |
| Sex                      | male                  | 0.81 (-0.14 – 1.75)                               | 0.093   | 0.35 (-0.61 – 1.32)                               | 0.47    |
| BMI (kg/m <sup>2</sup> ) | ≥25                   | 1.33 (0.27 – 2.39)                                | 0.014   | 1.05 (-0.15 – 2.24)                               | 0.085   |
| ASA score                | ≥3                    | 3.10 (-0.03 – 6.23)                               | 0.052   | 1.97 (-1.14 – 5.09)                               | 0.21    |
| Lymph node dissection    | D2                    | 1.55 (-0.25 – 3.35)                               | 0.091   | 1.13 (-0.82 – 3.08)                               | 0.25    |
| cStage                   | II                    | 3.26 (0.93 – 5.59)                                | 0.006   | 1.73 (-0.70 – 4.17)                               | 0.16    |
|                          | III                   | 3.24 (0.85 - 5.12)                                | 0.007   | 0.90 (-3.12 – 6.32)                               | 0.54    |
| Serum albumin (g/dl)     | ≤3.5                  | 2.40 (-0.052 – 4.85)                              | 0.055   | 1.42 (-1.23 – 4.06)                               | 0.29    |
| Diabetes mellitus        | yes                   | 0.47 (-0.91 – 1.86)                               | 0.50    | -                                                 | -       |

|            |     |                     |      |   |   |
|------------|-----|---------------------|------|---|---|
| Sarcopenia | yes | 0.42 (-0.51 – 1.35) | 0.38 | - | - |
| NAC        | yes | 0.32 (-1.04 – 1.68) | 0.64 | - | - |

BMI: body mass index, ASA: American Society of Anesthesiologists, NAC: neoadjuvant chemotherapy, TG: total gastrectomy

Supplemental Table 2: Univariate and multivariate analyses of operation time

| Variable                 |                       | Univariate analysis                          |         | Multivariate analysis                        |         |
|--------------------------|-----------------------|----------------------------------------------|---------|----------------------------------------------|---------|
|                          |                       | Regression coefficient<br>[β] (min) (95% CI) | P value | Regression coefficient<br>[β] (min) (95% CI) | P value |
| Visceral fat area        | per 1 cm <sup>2</sup> | 0.36 (0.23 – 0.49)                           | <0.001  | 0.23 (0.11 – 0.35)                           | <0.001  |
| Operative procedure      | TG                    | 49.6 (42.4 – 56.7)                           | <0.001  | 43.7 (37.7 – 49.6)                           | <0.001  |
| NAC                      | yes                   | 38.1 (27.0 – 49.1)                           | <0.001  | 12.2 (1.5 – 22.8)                            | 0.025   |
| Sex                      | male                  | 16.3 (8.4 – 24.1)                            | <0.001  | 8.5 (2.4 – 14.6)                             | 0.007   |
| BMI (kg/m <sup>2</sup> ) | ≥25                   | 19.1 (10.2 – 27.9)                           | <0.001  | 10.8 (3.3 – 18.3)                            | 0.005   |
| Surgical approach        | open                  | -24.2 (-35.8 – -12.7)                        | 0.008   | -59.8 (-72.6 – -45.6)                        | <0.001  |
|                          | robotic               | 26.9 (9.6 – 44.3)                            | 0.002   | 10.5 (-2.7 – 23.6)                           | 0.12    |
| Lymph node dissection    | D2                    | 56.4 (41.9 – 70.8)                           | <0.001  | 30.1 (17.8 – 42.4)                           | <0.001  |
| cStage                   | II                    | 43.5 (24.8 – 62.3)                           | <0.001  | 21.9 (6.3 – 37.6)                            | 0.006   |
|                          | III                   | 78.5 (35.7 – 121.2)                          | <0.001  | 38.9 (15.4 – 52.3)                           | 0.004   |
| Serum albumin (g/dl)     | ≤3.5                  | 22.6 (1.9 – 43.3)                            | 0.033   | 17.8 (1.5 – 34.1)                            | 0.033   |
| Age                      | per 1 year            | 0.050 (-0.66 – 0.76)                         | 0.89    | -                                            | -       |
| ASA score                | ≥3                    | -15.9 (-42.4 – 10.6)                         | 0.24    | -                                            | -       |
| Diabetes mellitus        | yes                   | 5.8 (-5.9 – 17.5)                            | 0.33    | -                                            | -       |
| Sarcopenia               | yes                   | -1.54 (-9.39 – 6.31)                         | 0.70    | -                                            | -       |

BMI: body mass index, ASA: American Society of Anesthesiologists, NAC: neoadjuvant chemotherapy, TG: total gastrectomy

Supplemental Table 3: Univariate and multivariate analyses of blood loss during surgery

| Variable                 |                       | Univariate analysis                         |         | Multivariate analysis                       |         |
|--------------------------|-----------------------|---------------------------------------------|---------|---------------------------------------------|---------|
|                          |                       | Regression coefficient<br>[β] (ml) (95% CI) | P value | Regression coefficient<br>[β] (ml) (95% CI) | P value |
| Visceral fat area        | per 1 cm <sup>2</sup> | 0.63 (0.31 – 0.95)                          | <0.001  | 0.43 (0.12 – 0.73)                          | 0.006   |
| Operative procedure      | TG                    | 33.3 (13.3 – 53.3)                          | 0.0038  | 25.4 (7.5 – 43.2)                           | 0.006   |
| Surgical approach        | open                  | 575 (549 - 602)                             | <0.001  | 558 (532 – 585)                             | <0.001  |
|                          | robotic               | 194 (153 - 233)                             | <0.001  | 182 (142 – 221)                             | <0.001  |
| Lymph node dissection    | D2                    | 54.5 (17.5- 91.5)                           | 0.004   | 54.9 (18.4 – 91.4)                          | 0.003   |
| Sex                      | male                  | 19.8 (0.26 – 39.3)                          | 0.047   | 8.6 (-9.7 – 26.9)                           | 0.35    |
| NAC                      | yes                   | 29.9 (1.9 – 57.9)                           | 0.037   | 8.1 (-23.4 – 39.5)                          | 0.61    |
| cStage                   | II                    | 39.7 (-8.7 – 88.1)                          | 0.11    | -23.2 (-69.2 – 22.7)                        | 0.32    |
|                          | III                   | 61.1 (19.8 – 103.4)                         | 0.012   | -14.2 (-48.7 – 30.8)                        | 0.34    |
| Age                      | per 1 year            | -0.060 (-1.80 – 1.68)                       | 0.95    | -                                           | -       |
| BMI (kg/m <sup>2</sup> ) | ≥25                   | 11.4 (-10.6 – 33.5)                         | 0.31    | -                                           | -       |
| ASA score                | ≥3                    | 10.9 (-54.1 – 75.9)                         | 0.74    | -                                           | -       |
| Diabetes mellitus        | yes                   | -6.12 (-34.7 – 22.5)                        | 0.67    | -                                           | -       |
| Sarcopenia               | yes                   | -9.3 (-28.5 - 9.9)                          | 0.34    | -                                           | -       |
| Serum albumin (g/dl)     | ≤3.5                  | 22.7 (-28.2 – 73.5)                         | 0.38    | -                                           | -       |

BMI: body mass index, ASA: American Society of Anesthesiologists, NAC: neoadjuvant chemotherapy, TG: total gastrectomy

**Supplemental Table 4: Stratified analysis about BMI**

| BMI<25 (n=435)    |                       |                       |         |
|-------------------|-----------------------|-----------------------|---------|
|                   |                       | OR (95% CI)           | P value |
| Visceral fat area | per 1 cm <sup>2</sup> | 1.009 (1.004 – 1.015) | 0.001   |

  

| BMI≥25 (n=131)    |                       |                       |         |
|-------------------|-----------------------|-----------------------|---------|
|                   |                       | OR (95% CI)           | P value |
| Visceral fat area | per 1 cm <sup>2</sup> | 1.009 (1.002 – 1.017) | 0.016   |

**Supplemental Table 5: Stratified analysis about DM**

| DM : no (n=498)   |                       |                       |         |
|-------------------|-----------------------|-----------------------|---------|
|                   |                       | OR (95% CI)           | P value |
| Visceral fat area | per 1 cm <sup>2</sup> | 1.009 (1.005 – 1.014) | <0.001  |

  

| DM : yes (n=68)   |                       |                      |         |
|-------------------|-----------------------|----------------------|---------|
|                   |                       | OR (95% CI)          | P value |
| Visceral fat area | per 1 cm <sup>2</sup> | 1.009 (0.91 – 1.077) | 0.097   |

**Supplemental Table 6: Relationship between sarcopenic obesity (SO) and infectious complications after laparoscopic total gastrectomy (n=153)**

|                          | SO (n=41) | The other (n=112) | P value |
|--------------------------|-----------|-------------------|---------|
| Infectious complications | 12 (29%)  | 17 (15%)          | 0.049   |

SO are patients with sarcopenia (using Prado's criteria) and obesity (VFA≥100 cm<sup>2</sup>).

Infectious complications include superficial SSI, abdominal abscess, pancreatic fistula and anastomotic leakage that are grade II or higher using the Clavien-Dindo classification.
